# Supplementary material for: Dysregulated ErbB4 Splicing in Schizophrenia: Selective Effects on Parvalbumin Expression
Source: Atypon-hosted journal article supplement (doi:10.1176/appi.ajp.2015.15020150), 2015-09-04
Supplement: appi.ajp.2015.15020150.ds001.pdf [file appi.ajp.2015.15020150.ds001.pdf]

## **Supplementary Methods**

### *Total Gray Matter RNA Extraction*

The gray-white matter boundary of DLPFC area 9 in a tissue block from each subject was carefully scored with a scalpel blade where the gray matter had uniform thickness and the gray-white matter boundary was easily delineated. The scored gray matter region of the tissue block was then digitally photographed, and the number of tissue sections (40  $\mu\text{m}$ ) required to collect  $\sim 30 \text{ mm}^3$  of gray matter was determined for each subject. The calculated number of required tissue sections for each subject was then cut by cryostat, and gray matter was separately collected into a tube containing TRIzol reagent in a manner that ensured minimal white matter contamination and excellent RNA preservation. Complementary DNA (cDNA) was synthesized from standardized dilutions of total RNA (10 ng/ $\mu\text{l}$ ) for each subject.

### *Microarray Analysis*

For laser microdissection of individual neurons, cryostat sections of DLPFC area 9 were dual-labeled with lectin *Vicia villosa* agglutinin (VVA) and anti-NeuN antibody in order to visualize parvalbumin interneuron-selective perineuronal nets and all neurons, respectively. RNA was extracted from pooled samples of 360 VVA-labeled neurons, converted into cDNA, amplified, labeled with biotin, and loaded on Affymetrix GeneChip HT HG-U133+ PM Array Plate (Affymetrix, Santa Clara, CA). Scanned images were segmented and converted into DAT files, using Microarray Analysis Suite 5.0. Segmented images were normalized and log<sub>2</sub>-transformed using GeneChip Robust Multiarray Average (1).

### *Genotype Analysis*

DNA was isolated from brain tissue using standard techniques and genotyped by the Illumina Infinium HumanOmniExpressExome array (Illumina, INC, San Diego, CA). Genotype calls were retained if they passed quality control for samples and SNPs, which yielded 767,368

SNPs for all samples. To impute a larger set of genotypes per sample, haplotypes were inferred and variants were imputed in 5Mb segments by Impute v2.3.1 (2) with the 1000 Genomes Phase 1 integrated reference panel (3). Of the 4 SNPs evaluated in this study, 3 were genotyped directly and one was imputed (rs4673628). Due to missing genotype information, some subjects were excluded from the analyses.

### *Statistical Analysis*

Repeated measures model was implemented in SAS PROC MIXED using the REML method in order to analyze layer-specific expression of PV, CR and ErbB4 splicing variants. In the REML method, the Kenward-Roger degrees of freedom approximation method was used to compute the denominator degrees of freedom (4). Paired and unpaired repeated measures models included mRNA level as the dependent variable; diagnosis, cortical layer, and the interaction between diagnosis and cortical level as main effects. Covariates were included in each model as described for the ANCOVA model.

The potential influence of co-morbid factors (e.g., diagnosis of schizoaffective disorder; history of substance dependence or abuse; nicotine use at time of death; antipsychotic, antidepressant or benzodiazepine and/or sodium valproate use at time of death; or death by suicide) on the levels of JM-a, JM-b, CYT-1 and CYT-2 mRNAs in layer 4 of schizophrenia subjects were assessed by using an ANCOVA model with each factor as the main effect and sex, age, brain pH, RIN, PMI, storage time as covariates.

Relationships between the ratios of minor to major ErbB4 splicing variants and CR or PV mRNA levels in layers 2 or 4, respectively, were assessed by Pearson's correlation analysis with the Bonferroni-corrected alpha level of 0.006 (5).

## References

1. Georgiev D, Arion D, Enwright JF, Kikuchi M, Minabe Y, Corradi JP, Lewis DA, Hashimoto T. Lower gene expression for KCNS3 potassium channel subunit in parvalbumin-containing neurons in the prefrontal cortex in schizophrenia. *Am J Psychiatry*. 2014;171:62-71.
2. Howie BN, Donnelly P, Marchini J. A flexible and accurate genotype imputation method for the next generation of genome-wide association studies. *PLoS Genet*. 2009;5:e1000529.
3. Genomes Project C, Abecasis GR, Altshuler D, Auton A, Brooks LD, Durbin RM, Gibbs RA, Hurles ME, McVean GA. A map of human genome variation from population-scale sequencing. *Nature*. 2010;467:1061-1073.
4. Kenward MG, Roger JH. Small sample inference for fixed effects from restricted maximum likelihood. *Biometrics*. 1997;53:983-997.
5. Curtin F, Schulz P. Multiple correlations and Bonferroni's correction. *Biol Psychiatry*. 1998;44:775-777.

**Table S1.** Demographic, postmortem, and clinical characteristics of human subjects used in this study.

| Subject Group <sup>a</sup> |   | Case # | S/R/A <sup>b</sup> | PMI <sup>c</sup> | pH  | RIN | Storage time <sup>d</sup> | Cause of death <sup>e</sup>       | DSM IV Diagnoses <sup>f</sup><br>Primary Substance <sup>g</sup> | Anti-<br>psychotics<br>ATOD | Anti-<br>depressants<br>ATOD | BZ/VPA<br>ATOD <sup>h</sup> |
|----------------------------|---|--------|--------------------|------------------|-----|-----|---------------------------|-----------------------------------|-----------------------------------------------------------------|-----------------------------|------------------------------|-----------------------------|
| 1                          | C | 592    | M/B/41             | 22.1             | 6.7 | 9   | 216                       | ASCVD                             | N                                                               |                             |                              |                             |
|                            | S | 533    | M/W/40             | 29.1             | 6.8 | 8.4 | 225                       | Accidental Asphyxiation           | US                                                              | Y                           | N                            | N                           |
| 2                          | C | 567    | F/W/46             | 15               | 6.7 | 8.9 | 220                       | Mitral valve prolapse             | N                                                               |                             |                              |                             |
|                            | S | 537    | F/W/37             | 14.5             | 6.7 | 8.6 | 225                       | Suicide by hanging                | SA                                                              | N                           | N                            | N                           |
| 3                          | C | 516    | M/B/20             | 14               | 6.9 | 8.4 | 227                       | Homicide by gun shot              | N                                                               |                             |                              |                             |
|                            | S | 547    | M/B/27             | 16.5             | 7   | 7.4 | 223                       | Heat stroke                       | SA                                                              | Y                           | Y                            | Y                           |
| 4                          | C | 630    | M/W/65             | 21.2             | 7   | 9   | 210                       | ASCVD                             | N                                                               |                             |                              |                             |
|                            | S | 566    | M/W/63             | 18.3             | 6.8 | 8   | 220                       | ASCVD                             | US                                                              | AAR                         | Y                            | Y                           |
| 5                          | C | 604    | M/W/39             | 19.3             | 7.1 | 8.6 | 213                       | Hypoplastic coronary artery       | N                                                               |                             |                              |                             |
|                            | S | 581    | M/W/46             | 28.1             | 7.2 | 7.9 | 218                       | Accidental combined drug overdose | PS                                                              | ADC;<br>OAC                 | Y                            | N                           |
| 6                          | C | 546    | F/W/37             | 23.5             | 6.7 | 8.6 | 224                       | ASCVD                             | N                                                               |                             |                              |                             |
|                            | S | 587    | F/B/38             | 17.8             | 7   | 9   | 216                       | Myocardial hypertrophy            | US                                                              | AAR                         | Y                            | N                           |
| 7                          | C | 551    | M/W/61             | 16.4             | 6.6 | 8.3 | 222                       | Cardiac tamponade                 | N                                                               |                             |                              |                             |
|                            | S | 625    | M/B/49             | 23.5             | 7.3 | 7.6 | 210                       | ASCVD                             | DS                                                              | AAC                         | Y                            | Y                           |
| 8                          | C | 685    | M/W/56             | 14.5             | 6.6 | 8.1 | 203                       | Hypoplastic coronary artery       | N                                                               |                             |                              |                             |
|                            | S | 622    | M/W/58             | 18.9             | 6.8 | 7.4 | 210                       | Right MCA infarction              | US                                                              | N                           | N                            | N                           |
| 9                          | C | 681    | M/W/51             | 11.6             | 7.2 | 8.9 | 203                       | Hypertrophic cardiomyopathy       | N                                                               |                             |                              |                             |
|                            | S | 640    | M/W/49             | 5.2              | 6.9 | 8.4 | 208                       | Pulmonary embolism                | PS                                                              | Y                           | Y                            | N                           |
| 10                         | C | 806    | M/W/57             | 24               | 6.9 | 7.8 | 182                       | Pulmonary embolism                | N                                                               |                             |                              |                             |
|                            | S | 665    | M/B/59             | 28.1             | 6.9 | 9.2 | 206                       | Intestinal hemorrhage             | PS                                                              | ADC                         | Y                            | Y                           |
| 11                         | C | 822    | M/B/28             | 25.3             | 7   | 8.5 | 179                       | ASCVD                             | N                                                               |                             |                              |                             |
|                            | S | 787    | M/B/27             | 19.2             | 6.7 | 8.4 | 185                       | Suicide by gun shot               | SA                                                              | ODC                         | Y                            | N                           |
| 12                         | C | 727    | M/B/19             | 7                | 7.2 | 9.2 | 196                       | Trauma                            | N                                                               |                             |                              |                             |
|                            | S | 829    | M/W/25             | 5                | 6.8 | 9.3 | 177                       | Suicide by drug overdose          | SA                                                              | ADC;<br>OAR                 | N                            | N                           |
| 13                         | C | 871    | M/W/28             | 16.5             | 7.1 | 8.5 | 169                       | Trauma                            | N                                                               |                             |                              |                             |
|                            | S | 878    | M/W/33             | 10.8             | 6.7 | 8.9 | 168                       | Myocardial fibrosis               | DS                                                              | ADC                         | Y                            | Y                           |
| 14                         | C | 575    | F/B/55             | 11.3             | 6.8 | 9.6 | 218                       | ASCVD                             | N                                                               |                             |                              |                             |
|                            | S | 517    | F/W/48             | 3.7              | 6.7 | 9.3 | 227                       | Intracerebral hemorrhage          | DS                                                              | ADC                         | Y                            | N                           |
| 15                         | C | 700    | M/W/42             | 26.1             | 7   | 8.7 | 200                       | ASCVD                             | N                                                               |                             |                              |                             |
|                            | S | 539    | M/W/50             | 40.5             | 7.1 | 8.1 | 224                       | Suicide by combined drug overdose | SA                                                              | ADR                         | Y                            | Y                           |
| 16                         | C | 988    | M/W/82             | 22.5             | 6.2 | 8.4 | 147                       | Trauma                            | N                                                               |                             |                              |                             |
|                            | S | 621    | M/W/83             | 16               | 7.3 | 8.7 | 211                       | Accidental asphyxiation           | US                                                              | N                           | N                            | N                           |

| Subject Group <sup>a</sup> | Case # | S/R/A <sup>b</sup> | PMI <sup>c</sup> | pH   | RIN | Storage time <sup>d</sup> | Cause of death <sup>e</sup> | DSM IV Diagnoses <sup>f</sup> |                        | Anti-psychotics ATOD | Anti-depressants ATOD | BZ/VPA ATOD <sup>h</sup> |
|----------------------------|--------|--------------------|------------------|------|-----|---------------------------|-----------------------------|-------------------------------|------------------------|----------------------|-----------------------|--------------------------|
|                            |        |                    |                  |      |     |                           |                             | Primary                       | Substance <sup>g</sup> |                      |                       |                          |
| 17                         | C      | 686                | F/W/52           | 22.6 | 7   | 8.5                       | 202                         | ASCVD                         | N                      |                      |                       |                          |
|                            | S      | 656                | F/B/47           | 20.1 | 7.3 | 9.2                       | 207                         | Suicide by gun shot           | SA                     | ADC                  | Y                     | N                        |
| 18                         | C      | 634                | M/W/52           | 16.2 | 7   | 8.5                       | 209                         | ASCVD                         | N                      |                      |                       |                          |
|                            | S      | 722                | M/B/45           | 9.1  | 6.7 | 9.2                       | 197                         | Upper GI bleeding             | US                     | ODR; OAR             | Y                     | N                        |
| 19                         | C      | 852                | M/W/54           | 8    | 6.8 | 9.1                       | 172                         | Cardiac tamponade             | N                      |                      |                       |                          |
|                            | S      | 781                | M/B/52           | 8    | 6.7 | 7.7                       | 187                         | Peritonitis                   | SA                     | ADR                  | Y                     | Y                        |
| 20                         | C      | 987                | F/W/65           | 21.5 | 6.8 | 9.1                       | 147                         | ASCVD                         | N                      |                      |                       |                          |
|                            | S      | 802                | F/W/63           | 29   | 6.4 | 9.2                       | 182                         | Right ventricular dysplasia   | SA                     | ADC; ODR             | Y                     | N                        |
| 21                         | C      | 818                | F/W/67           | 24   | 7.1 | 8.4                       | 180                         | Anaphylactic reaction         | N                      |                      |                       |                          |
|                            | S      | 917                | F/W/71           | 23.8 | 6.8 | 7                         | 160                         | ASCVD                         | US                     |                      | Y                     | N                        |
| 22                         | C      | 857                | M/W/48           | 16.6 | 6.7 | 8.9                       | 170                         | ASCVD                         | N                      |                      |                       |                          |
|                            | S      | 930                | M/W/47           | 15.3 | 6.2 | 8.2                       | 157                         | ASCVD                         | DS                     | ADR; OAR             | Y                     | N                        |
| 23                         | C      | 739                | M/W/40           | 15.8 | 6.9 | 8.4                       | 195                         | ASCVD                         | N                      |                      |                       |                          |
|                            | S      | 933                | M/W/44           | 8.3  | 5.9 | 8.1                       | 156                         | Myocarditis                   | DS                     |                      | Y                     | Y                        |
| 24*#                       | C      | 1047               | M/W/43           | 13.8 | 6.6 | 9                         | 129                         | ASCVD                         | N                      |                      |                       |                          |
|                            | S      | 1209               | M/W/35           | 9.1  | 6.5 | 8.7                       | 110                         | Diphenhydramine overdose      | SA                     |                      | Y                     | N                        |
| 25*#                       | C      | 1086               | MW/51            | 24.2 | 6.8 | 8.1                       | 123                         | ASCVD                         | N                      |                      |                       |                          |
|                            | S      | 10025              | MB/52            | 27.1 | 6.7 | 7.8                       | 102                         | ASCVD                         | DS                     | OAR                  | N                     | N                        |
| 26*#                       | C      | 1092               | F/B/40           | 16.6 | 6.8 | 8                         | 123                         | Mitral valve prolapse         | N                      |                      |                       |                          |
|                            | S      | 1178               | F/B/37           | 18.9 | 6.1 | 8.4                       | 114                         | Pulmonary embolism            | SA                     |                      | Y                     | N                        |
| 27*                        | C      | 10005              | M/W/42           | 23.5 | 6.7 | 7.4                       | 111                         | Trauma                        | N                      |                      |                       |                          |
|                            | S      | 1256               | M/W/34           | 27.4 | 6.4 | 7.9                       | 103                         | Hanging                       | US                     |                      | Y                     | N                        |
| 28*#                       | C      | 1336               | M/W/65           | 18.4 | 6.8 | 8                         | 88                          | Cardiac tamponade             | N                      |                      |                       |                          |
|                            | S      | 1173               | M/W/62           | 22.9 | 6.4 | 7.7                       | 114                         | ASCVD                         | DS                     | ADR                  | Y                     | N                        |
| 29*#                       | C      | 1122               | M/W/55           | 15.4 | 6.7 | 7.9                       | 119                         | Cardiac tamponade             | N                      |                      |                       |                          |
|                            | S      | 1105               | M/W/53           | 7.9  | 6.2 | 8.9                       | 121                         | ASCVD                         | SA                     |                      | Y                     | N                        |
| 30*                        | C      | 1284               | M/W/55           | 6.4  | 6.8 | 8.7                       | 98                          | ASCVD                         | N                      |                      |                       |                          |
|                            | S      | 1188               | M/W/58           | 7.7  | 6.2 | 8.4                       | 113                         | ASCVD                         | US                     | AAR; OAR             | Y                     | N                        |
| 31*                        | C      | 1191               | M/B/59           | 19.4 | 6.2 | 8.4                       | 112                         | ASCVD                         | N                      |                      |                       |                          |
|                            | S      | 1263               | M/W/62           | 22.7 | 7.1 | 8.5                       | 102                         | Asphyxiation                  | US                     | ADR                  | Y                     | Y                        |
| 32*#                       | C      | 970                | M/W/42           | 25.9 | 6.4 | 7.2                       | 141                         | ASCVD                         | N                      |                      |                       |                          |
|                            | S      | 1222               | M/W/32           | 30.8 | 6.4 | 7.5                       | 108                         | Combined drug overdose        | US                     | AAC                  | Y                     | Y                        |
| 33*                        | C      | 10003              | M/W/49           | 21.2 | 6.5 | 8.4                       | 112                         | Trauma                        | N                      |                      |                       |                          |
|                            | S      | 1088               | M/W/49           | 21.5 | 6.5 | 8.1                       | 124                         | Combined drug overdose        | US                     | ADC; OAC             | Y                     | Y                        |
| 34*                        | C      | 1247               | F/W/58           | 22.7 | 6.4 | 8.4                       | 104                         | ASCVD                         | N                      |                      |                       |                          |
|                            | S      | 1240               | F/B/50           | 22.9 | 6.3 | 7.7                       | 105                         | ASCVD                         | US                     | ADR                  | Y                     | N                        |

| Subject Group <sup>a</sup> | Case # | S/R/A <sup>b</sup> | PMI <sup>c</sup> | pH   | RIN | Storage time <sup>d</sup> | Cause of death <sup>e</sup> | DSM IV Diagnoses <sup>f</sup> |                        | Anti-psychotics ATOD | Anti-depressants ATOD | BZ/VPA ATOD <sup>h</sup> |
|----------------------------|--------|--------------------|------------------|------|-----|---------------------------|-----------------------------|-------------------------------|------------------------|----------------------|-----------------------|--------------------------|
|                            |        |                    |                  |      |     |                           |                             | Primary                       | Substance <sup>g</sup> |                      |                       |                          |
| 35*#                       | C      | 1324               | M/W/43           | 22.3 | 7   | 7.3                       | 90                          | Aortic dissection             | N                      |                      |                       |                          |
|                            | S      | 10020              | M/W/38           | 28.8 | 6.6 | 7.4                       | 104                         | Salicylate overdose           | PS                     | AAC;<br>OAC          | Y                     | Y                        |
| 36*#                       | C      | 1099               | F/W/24           | 9.1  | 6.5 | 8.6                       | 122                         | Cardiomyopathy                | N                      |                      |                       |                          |
|                            | S      | 10023              | F/B/25           | 20.1 | 6.7 | 7.4                       | 103                         | Suicide by drowning           | DS                     |                      | Y                     | Y                        |
| 37*#                       | C      | 1307               | M/B/32           | 4.8  | 6.7 | 7.6                       | 93                          | ASCVD                         | N                      |                      |                       |                          |
|                            | S      | 10024              | M/B/37           | 6    | 6.1 | 7.5                       | 103                         | ASCVD                         | PS                     |                      | N                     | N                        |
| 38*#                       | C      | 1391               | F/W/51           | 7.8  | 6.6 | 7.1                       | 79                          | ASCVD                         | N                      |                      |                       |                          |
|                            | S      | 1189               | F/W/47           | 14.4 | 6.4 | 8.3                       | 113                         | Combined drug overdose        | SA                     | AAR                  | Y                     | Y                        |
| 39*#                       | C      | 1282               | F/W/39           | 24.5 | 6.8 | 7.5                       | 99                          | ASCVD                         | N                      |                      |                       |                          |
|                            | S      | 1211               | F/W/41           | 20.1 | 6.3 | 7.8                       | 110                         | Sudden unexpected death       | SA                     |                      | Y                     | Y                        |
| 40*#                       | C      | 1159               | M/W/51           | 16.7 | 6.5 | 7.6                       | 116                         | ASCVD                         | N                      |                      |                       |                          |
|                            | S      | 1296               | M/W/48           | 7.8  | 6.5 | 7.3                       | 96                          | Pneumonia                     | US                     |                      | Y                     | Y                        |
| 41*#                       | C      | 1326               | M/W/58           | 16.4 | 6.7 | 8                         | 90                          | ASCVD                         | N                      |                      |                       |                          |
|                            | S      | 1314               | M/W/50           | 11   | 6.2 | 7.2                       | 93                          | ASCVD                         | US                     |                      | Y                     | Y                        |
| 42*#                       | C      | 902                | M/W/60           | 23.6 | 6.7 | 7.7                       | 155                         | ASCVD                         | N                      |                      |                       |                          |
|                            | S      | 1361               | M/W/63           | 23.2 | 6.4 | 7.7                       | 85                          | Cardiomyopathy                | SA                     | ODC                  | Y                     | N                        |
| 43*                        | C      | 1374               | M/W/43           | 21.7 | 6.6 | 7.2                       | 85                          | ASCVD                         | N                      |                      |                       |                          |
|                            | S      | 904                | M/W/33           | 28   | 6.2 | 7.1                       | 156                         | Pneumonia                     | SA                     |                      | Y                     | N                        |
| 44*                        | C      | 1555               | M/W/17           | 15.1 | 6.9 | 7.9                       | 50                          | Trauma                        | N                      |                      |                       |                          |
|                            | S      | 1649               | M/B/17           | 21.4 | 6.9 | 8.1                       | 35                          | Hanging                       | US                     |                      | Y                     | Y                        |
| 45*                        | C      | 1268               | M/B/49           | 19.9 | 7.1 | 7.9                       | 102                         | ASCVD                         | N                      |                      |                       |                          |
|                            | S      | 1230               | M/W/50           | 16.9 | 6.6 | 8.2                       | 108                         | Doxepin overdose              | US                     |                      | Y                     | Y                        |
| 46*                        | C      | 1466               | F/B/64           | 20   | 6.7 | 8.8                       | 67                          | Trauma                        | N                      |                      |                       |                          |
|                            | S      | 1341               | F/W/44           | 24.5 | 6.6 | 8.8                       | 89                          | Trauma                        | SA                     | ODC                  | Y                     | N                        |
| 47*                        | C      | 1518               | M/W/50           | 20.7 | 6.4 | 7.7                       | 56                          | ASCVD                         | N                      |                      |                       |                          |
|                            | S      | 1367               | M/W/47           | 28.9 | 6.6 | 7.2                       | 86                          | Combined drug overdose        | SA                     | ADC;<br>ODR          | N                     | N                        |
| 48*                        | C      | 1386               | M/W/46           | 21.2 | 6.7 | 8.3                       | 82                          | ASCVD                         | N                      |                      |                       |                          |
|                            | S      | 1420               | M/W/47           | 23.4 | 6.8 | 8.2                       | 75                          | Jump                          | SA                     | AAR;<br>ODC;<br>OAR  | Y                     | Y                        |
| 49*                        | C      | 1472               | M/W/61           | 23.8 | 6.5 | 8                         | 66                          | Pulmonary embolism            | N                      |                      |                       |                          |
|                            | S      | 1453               | M/W/62           | 11.1 | 6.4 | 8.2                       | 69                          | Trauma                        | PS                     | ADR                  | N                     | N                        |
| 50*                        | C      | 1026               | M/W/59           | 19.8 | 6.3 | 7.4                       | 134                         | ASCVD                         | N                      |                      |                       |                          |
|                            | S      | 1454               | M/W/59           | 24.1 | 6.1 | 7.6                       | 69                          | Trauma                        | PS                     | AAR;<br>ODC          | Y                     | Y                        |
| 51*                        | C      | 694                | M/W/38           | 20.7 | 7   | 7.7                       | 195                         | Subarachnoid hemorrhage       | N                      |                      |                       |                          |
|                            | S      | 1455               | M/W/42           | 8.2  | 6.4 | 7.7                       | 69                          | Peritonitis                   | PS                     | AAR;<br>OAC          | Y                     | N                        |
| 52*                        | C      | 1350               | M/W/21           | 24.2 | 6.4 | 7.3                       | 88                          | Trauma                        | N                      |                      |                       |                          |
|                            | S      | 1474               | M/W/37           | 39.9 | 6.7 | 7                         | 66                          | Hanging                       | SA                     | ADR                  | N                     | N                        |

| Subject Group <sup>a</sup> | Case # | S/R/A <sup>b</sup> | PMI <sup>c</sup> | pH   | RIN | Storage time <sup>d</sup> | Cause of death <sup>e</sup> | DSM IV Diagnoses <sup>f</sup> |                        | Anti-<br>psychotics<br>ATOD | Anti-<br>depressants<br>ATOD | BZ/VPA<br>ATOD <sup>h</sup> |   |
|----------------------------|--------|--------------------|------------------|------|-----|---------------------------|-----------------------------|-------------------------------|------------------------|-----------------------------|------------------------------|-----------------------------|---|
|                            |        |                    |                  |      |     |                           |                             | Primary                       | Substance <sup>g</sup> |                             |                              |                             |   |
| 53*                        | C      | 1792               | F/W/36           | 28.1 | 6.5 | 7.5                       | 10                          | Pulmonary embolism            |                        | N                           |                              |                             |   |
|                            | S      | 1506               | F/W/47           | 14.1 | 6.6 | 7.5                       | 60                          | Combined drug overdose        |                        | SA                          | ADC                          | Y                           | Y |
| 54*                        | C      | 1524               | M/W/66           | 9.4  | 6.4 | 8.1                       | 55                          | Intestinal infarction         |                        | N                           |                              |                             |   |
|                            | S      | 1542               | M/W/65           | 17.4 | 6.7 | 7.8                       | 52                          | Combined drug overdose        |                        | PS                          |                              | Y                           | Y |
| 55*                        | C      | 1270               | F/W/73           | 19.7 | 6.7 | 7.7                       | 102                         | Trauma                        |                        | N                           |                              |                             |   |
|                            | S      | 1579               | F/W/69           | 16.1 | 6.7 | 7.7                       | 46                          | ASCVD                         |                        | SA                          | ADR;<br>ODC                  | Y                           | N |
| 56*                        | C      | 1372               | M/W/37           | 20.5 | 6.6 | 9                         | 86                          | Asphyxiation                  |                        | N                           |                              |                             |   |
|                            | S      | 1581               | M/W/32           | 18.4 | 6.8 | 9                         | 45                          | ASCVD                         |                        | PS                          | ODC;<br>OAC                  | Y                           | Y |
| 57*                        | C      | 1543               | F/W/45           | 17.9 | 6.8 | 7.4                       | 52                          | Subarachnoid hemorrhage       |                        | N                           |                              |                             |   |
|                            | S      | 10026              | F/W/46           | 23.8 | 6.6 | 7.6                       | 104                         | Thermal injuries              |                        | US                          |                              | Y                           | Y |
| 58*                        | C      | 1583               | M/W/58           | 19.1 | 6.8 | 8.2                       | 45                          | Trauma                        |                        | N                           |                              |                             |   |
|                            | S      | 1686               | M/B/56           | 14.1 | 6.2 | 8.3                       | 28                          | ASCVD                         |                        | PS                          | AAR                          | Y                           | Y |
| 59*                        | C      | 1554               | M/W/50           | 23.2 | 6.5 | 7.6                       | 50                          | ASCVD                         |                        | N                           |                              |                             |   |
|                            | S      | 1691               | M/W/51           | 31.9 | 6.6 | 7.7                       | 27                          | Combined drug overdose        |                        | PS                          | ADR;<br>ODC                  | Y                           | N |
| 60*                        | C      | 1635               | M/W/66           | 25.3 | 6.8 | 8.2                       | 38                          | Cardiac tamponade             |                        | N                           |                              |                             |   |
|                            | S      | 1706               | M/B/60           | 28.1 | 6.8 | 8.4                       | 23                          | Sepsis                        |                        | SA                          | AAR;<br>ODC;<br>OAR          | Y                           | N |
| 61*                        | C      | 1384               | M/W/67           | 21.9 | 6.6 | 7                         | 83                          | ASCVD                         |                        | N                           |                              |                             |   |
|                            | S      | 1712               | M/W/63           | 15.1 | 6.2 | 7.1                       | 22                          | ASCVD                         |                        | SA                          | ADR;<br>ODC                  | Y                           | Y |
| 62*                        | C      | 1558               | M/W/54           | 24.4 | 6.9 | 7.7                       | 50                          | ASCVD                         |                        | N                           |                              |                             |   |
|                            | S      | 1734               | M/W/54           | 28.6 | 6.1 | 7.7                       | 19                          | Pneumonia                     |                        | US                          | AAR;<br>ODC;<br>OAR          | Y                           | N |

\*: Subject pairs used for layer-specific qPCR; #: Subject pairs used for microarray; **a**: C, normal comparison; S, schizophrenia; **b**: A, age in years; B, black; F, female; M, male; R, race; S, sex; W, white; **c**: PMI, postmortem interval (hours); **d**: Storage time (months) at -80C; **e**: ASCVD, arteriosclerotic cardiovascular disease; MCA, middle coronary artery; **f**: DS, disorganized schizophrenia; PS, paranoid schizophrenia; SA, schizoaffective disorder; US, undifferentiated schizophrenia; **g**: ADC, alcohol dependence, current at time of death; ADR, alcohol dependence, in remission at time of death; AAC, alcohol abuse, current at time of death; AAR, alcohol abuse, in remission at time of death; ODC, other substance dependence, current at time of death; ODR, other substance dependence, in remission at time of death; OAC, other substance abuse, current at time of death; OAR, other substance abuse, in remission at time of death; **h**: BZ/VPA ATOD; BZ, benzodiazepines; VPA, Sodium valproate; ATOD, at time of death; Y, yes; N, no.

**Table S2.** Oligonucleotide sequences of forward and reverse primers for ErbB4 splicing variants, pan-ErbB4 and MIAT.

| Gene      | Accession #  | Forward Primer           | Reverse Primer        | Amplicon size (bp) | Position  |
|-----------|--------------|--------------------------|-----------------------|--------------------|-----------|
| CYT-1     | NM_005235    | TTGGACACAGCCCTCCTC       | GGGCACAGACACTCCTTGT   | 98                 | 3241~3338 |
| CYT-2     | NM_001042599 | TGACTCGAATAGGAACCAAGTTTG | GGGTGCTACTGTCCTCTTGG  | 206                | 3221~3426 |
| JM-a      | NM_001042599 | TTAAAGATGGCCCAAACCTGTG   | CCCGTCCATGGGTAGTAAAT  | 172                | 1846~2017 |
| JM-b      | XM_005246377 | AAAGATGGCCCAAACCTGTGT    | ATCAGGCCGATGCAGTCTT   | 161                | 2375~2535 |
| Pan-ErbB4 | NM_001042599 | GACCAATGTCTGTCGTGTCG     | TCAAACCTCCCGAAATTCACC | 89                 | 1650~1738 |
| MIAT      | NR_003491.3  | GGTCCATGTGGTTAGGGTTG     | GGGTTAGTTGGTTGGCAGAA  | 227                | 4971~5197 |

**Table S3.** Summary statistics comparing the levels of transcripts between subject groups in total gray matter, layer 2 or 4 by paired ANCOVA or paired repeated measures models. Unpaired ANCOVA or unpaired repeated measures models yielded same statistical significance as the respective paired model.

| Transcript | % change in schizophrenia |         |         | ANCOVA            |        |                 |       | Repeated Measures |        |                   |       |                   |       |
|------------|---------------------------|---------|---------|-------------------|--------|-----------------|-------|-------------------|--------|-------------------|-------|-------------------|-------|
|            | Total Gray Matter         | Layer 2 | Layer 4 | Total Gray Matter |        | Layer 2         |       | Layer 4           |        | Layer 2           |       | Layer 4           |       |
|            |                           |         |         | F                 | p      | F               | p     | F                 | p      | F                 | p     | F                 | p     |
| PV         |                           | -9.9%   | -19.5%  |                   |        | $F_{1,38}=1.35$ | 0.253 | $F_{1,38}=14.6$   | <0.001 | $F_{1,114}=0.06$  | 0.808 | $F_{1,114}=27.2$  | 0.001 |
| CR         |                           | -6.1%   | -0.4%   |                   |        | $F_{1,38}=1.95$ | 0.171 | $F_{1,38}=0.002$  | 0.961  | $F_{1,114}=2.64$  | 0.107 | $F_{1,114}=0.06$  | 0.808 |
| JM-a       | +10.9%                    | +10.3%  | +22.1%  | $F_{1,61}=7.49$   | 0.008  | $F_{1,38}=1.71$ | 0.199 | $F_{1,38}=4.62$   | 0.038  | $F_{1,97.3}=1.41$ | 0.238 | $F_{1,97.3}=6.27$ | 0.014 |
| JM-b       | -11.5%                    | -15.0%  | -17.0%  | $F_{1,61}=17.1$   | <0.001 | $F_{1,37}=3.15$ | 0.084 | $F_{1,38}=15.1$   | 0.001  | $F_{1,65.1}=5.58$ | 0.021 | $F_{1,65.1}=6.54$ | 0.013 |
| CYT-1      | +4.7%                     | -1.1%   | +19.3%  | $F_{1,61}=0.97$   | 0.328  | $F_{1,38}=0.02$ | 0.902 | $F_{1,38}=7.07$   | 0.011  | $F_{1,75.8}=0.02$ | 0.890 | $F_{1,75.8}=4.87$ | 0.030 |
| CYT-2      | -10.0%                    | -3.2%   | -10.2%  | $F_{1,60}=12.3$   | <0.001 | $F_{1,38}=0.23$ | 0.635 | $F_{1,38}=3.98$   | 0.053  | $F_{1,98.3}=0.29$ | 0.592 | $F_{1,98.3}=2.73$ | 0.101 |
| Pan-ErbB4  | +3.9%                     | +1.3%   | -6.6%   | $F_{1,61}=3.39$   | 0.071  | $F_{1,38}=0.12$ | 0.727 | $F_{1,38}=1.92$   | 0.174  | $F_{1,81.5}=0.09$ | 0.761 | $F_{1,81.5}=2.28$ | 0.135 |
| MIAT       | +12.6%                    |         |         | $F_{1,60}=6.79$   | 0.012  |                 |       |                   |        |                   |       |                   |       |



**Table S4.** Relationship between the ratios of ErbB4 splicing variants and the levels of CR or PV mRNA and in layer 2 or 4, respectively.

|                    | CR in layer 2      |       |               |       | PV in layer 4      |       |               |                  |
|--------------------|--------------------|-------|---------------|-------|--------------------|-------|---------------|------------------|
|                    | Healthy Comparison |       | Schizophrenia |       | Healthy Comparison |       | Schizophrenia |                  |
|                    | r                  | p     | r             | p     | r                  | p     | r             | p                |
| <b>CYT-1/CYT-2</b> | -0.243             | 0.135 | -0.125        | 0.448 | -0.243             | 0.137 | -0.127        | 0.442            |
| <b>JM-a/JM-b</b>   | -0.275             | 0.091 | -0.132        | 0.424 | 0.017              | 0.920 | <b>-0.502</b> | <b>&lt;0.001</b> |

**Table S5.** Summary statistics displaying the main effect of genotypes and interactions between genotypes and diagnosis on the ratios of JM-a/JM-b variants or CYT-1/CYT-2 variants.

| Genotype  | JM-a/JM-b gray matter        |                              | JM-a/JM-b layer 4           |                             | Genotype  | CYT-1/CYT-2 gray matter      |                              | CYT-1/CYT-2 layer 4         |                             |
|-----------|------------------------------|------------------------------|-----------------------------|-----------------------------|-----------|------------------------------|------------------------------|-----------------------------|-----------------------------|
|           | Main effect                  | Interaction with diagnosis   | Main effect                 | Interaction with diagnosis  |           | Main effect                  | Interaction with diagnosis   | Main effect                 | Interaction with diagnosis  |
| rs4673628 | $F_{2,109}=0.289$<br>P=0.750 | $F_{2,109}=0.192$<br>P=0.825 | $F_{2,68}=0.767$<br>P=0.468 | $F_{2,68}=1.646$<br>P=0.200 | rs7598440 | $F_{2,114}=0.993$<br>P=0.374 | $F_{2,114}=1.026$<br>P=0.362 | $F_{2,71}=0.952$<br>P=0.391 | $F_{2,71}=0.855$<br>P=0.430 |
|           |                              |                              |                             |                             | rs839523  | $F_{2,114}=0.031$<br>P=0.969 | $F_{2,114}=0.152$<br>P=0.859 | $F_{2,71}=1.562$<br>P=0.271 | $F_{2,71}=0.404$<br>P=0.669 |
|           |                              |                              |                             |                             | rs707284  | $F_{2,114}=0.266$<br>P=0.767 | $F_{2,114}=0.046$<br>P=0.955 | $F_{2,71}=2.532$<br>P=0.087 | $F_{2,71}=0.255$<br>P=0.776 |

**Figure S1**

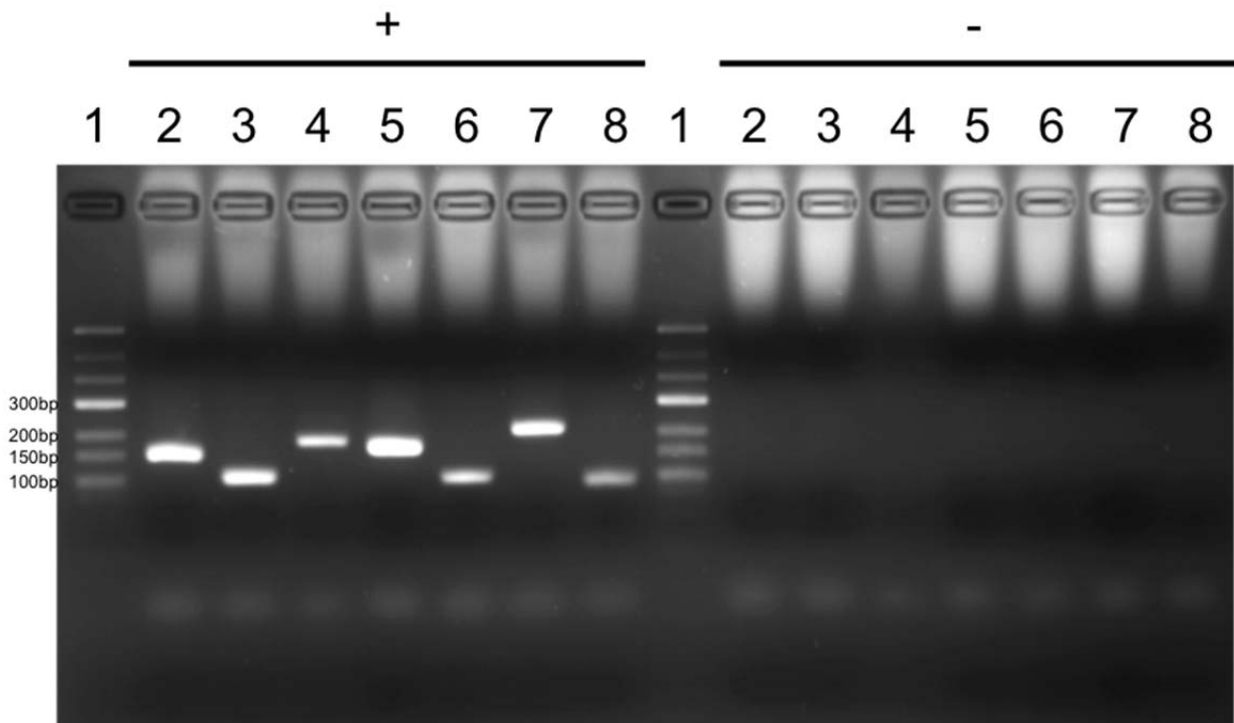

| Lane | Gene      | Predicted amplicon size |
|------|-----------|-------------------------|
| 1    | Ladder    |                         |
| 2    | CR        | 145bp                   |
| 3    | PV        | 99bp                    |
| 4    | JM-a      | 172bp                   |
| 5    | JM-b      | 161bp                   |
| 6    | CYT-1     | 98bp                    |
| 7    | CYT-2     | 206bp                   |
| 8    | Pan-ErbB4 | 89bp                    |

Figure S2

### CYT-1 PCR Blast

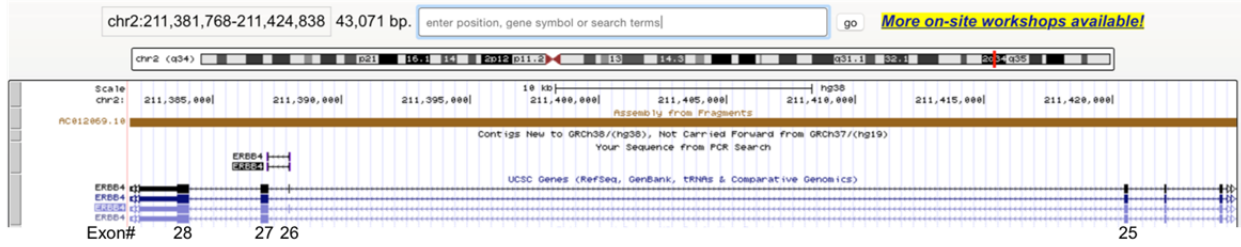

### CYT-2 PCR blast

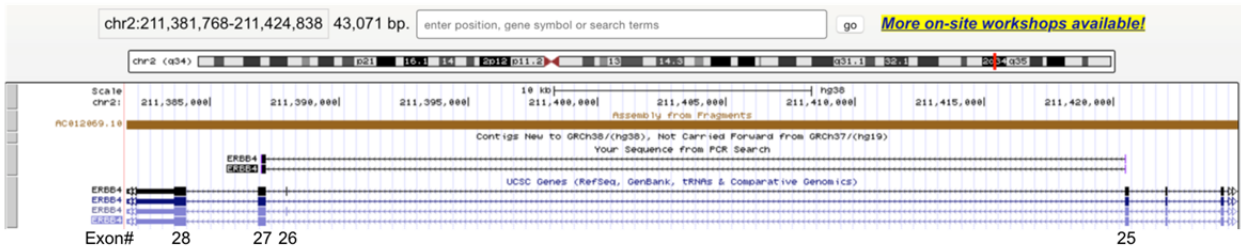

### JM-a PCR blast

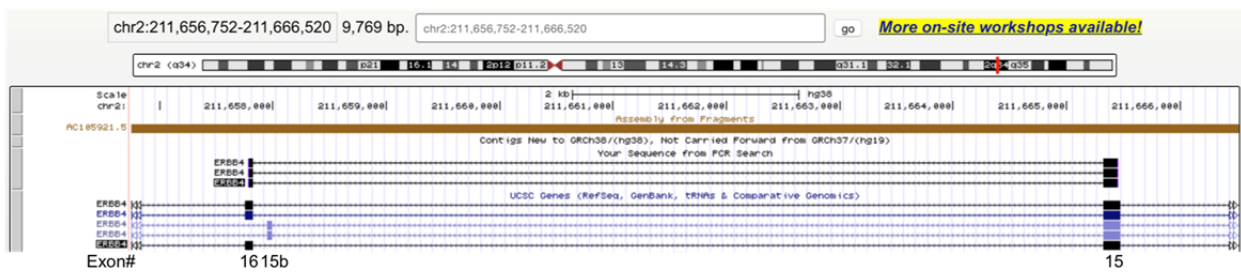

### JM-b PCR blast

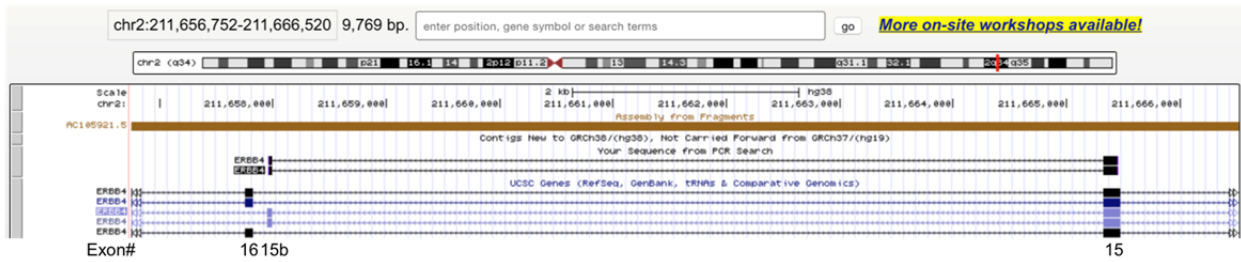

Figure S3

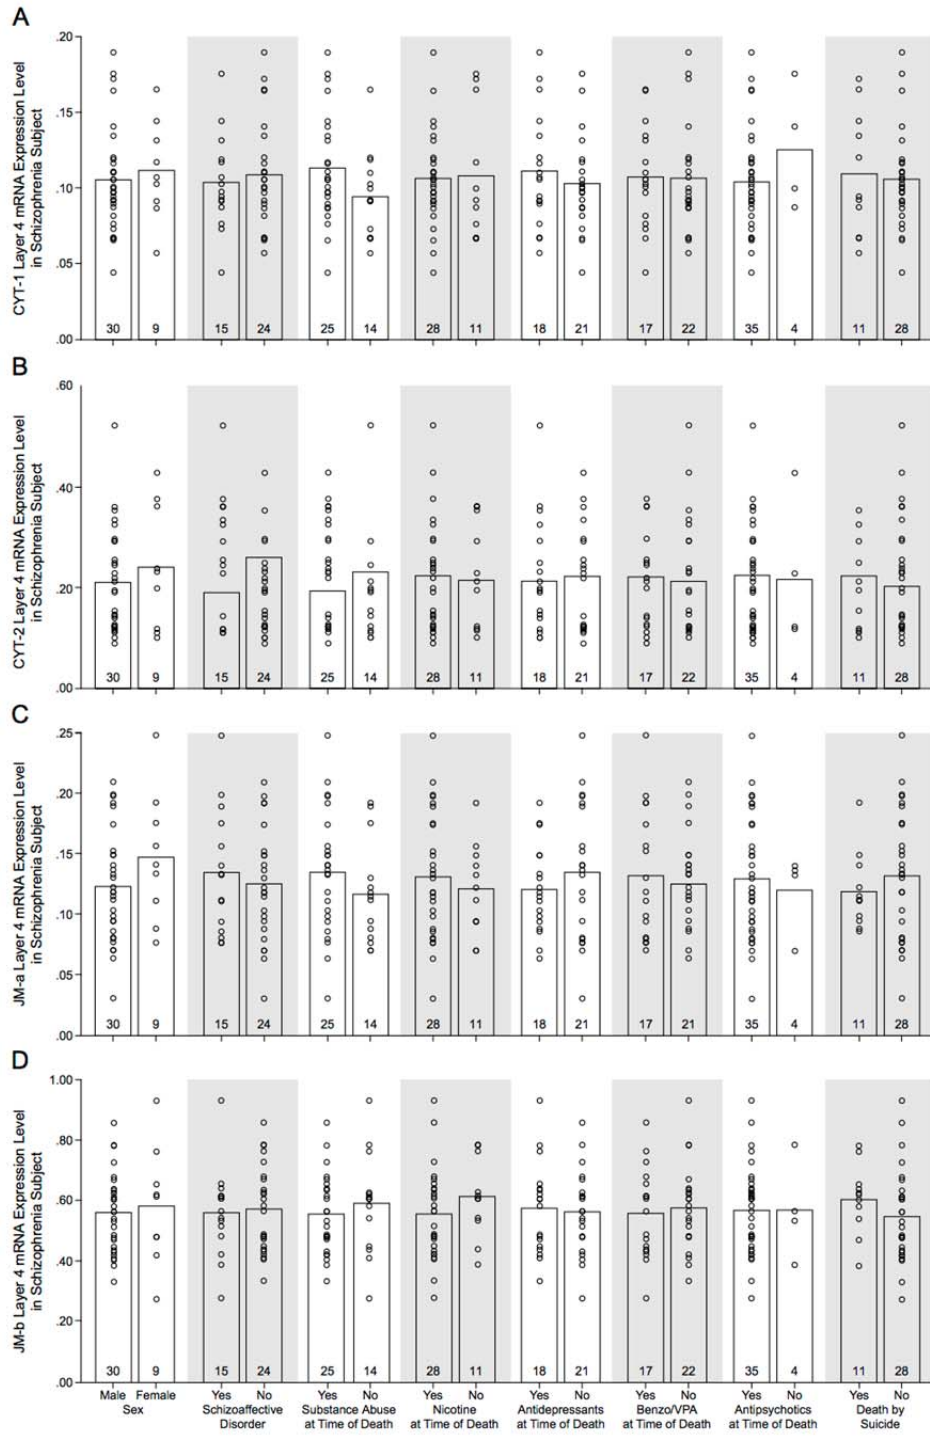

## Figure Legends

**Figure S1.** Gel electrophoresis displaying the post-qPCR amplicon products for calretinin, parvalbumin, ErbB4 splicing variants and Pan-ErbB4 transcripts. + : qPCR with cDNA. - : qPCR without cDNA. Ladder : GeneRuler Low Range DNA Ladder, Life Technologies Cat#SM1193.

**Figure S2.** Results of UCSC In-Silico PCR blast (<https://genome.ucsc.edu/cgi-bin/hgPcr>) for each primer pair targeting ErbB4 splicing variants in relation to the alternative exons of ErbB4 transcripts. Note that the primer pair targeting CYT-1 variant includes exon 26, whereas the pair targeting CYT-2 variant excludes it. The exon 16 or 15b is selectively spanned for the primer pair targeting JM-a or JM-b variants, respectively.

**Figure S3.** In each pair of plots, schizophrenia subjects are grouped by potential confounding factors listed on the x-axis. Circles represent the levels of ErbB4 splicing variants for individual subjects and the bars represent mean ErbB4 splicing variant levels for the indicated group. Numbers listed for each bar represent the number of schizophrenia subjects for each condition. Levels of CYT-1 (**A**), CYT-2 (**B**), JM-a (**C**) and JM-b (**D**) in layers 4 of schizophrenia subjects did not differ significantly (all F values <5.4, all p-values > 0.182) as a function of sex, diagnosis of schizoaffective disorder, history of substance dependence or abuse, nicotine use at the time of death, use of antipsychotics, antidepressants, or benzodiazepines and/or sodium valproate at the time of death, or death by suicide.
